# Supplementary material
Source: Springer Nature journal article supplement (https://www.springermedizin.de/resource/supplementary/12960_2009_171_MOESM4_ESM.pdf/9570564)

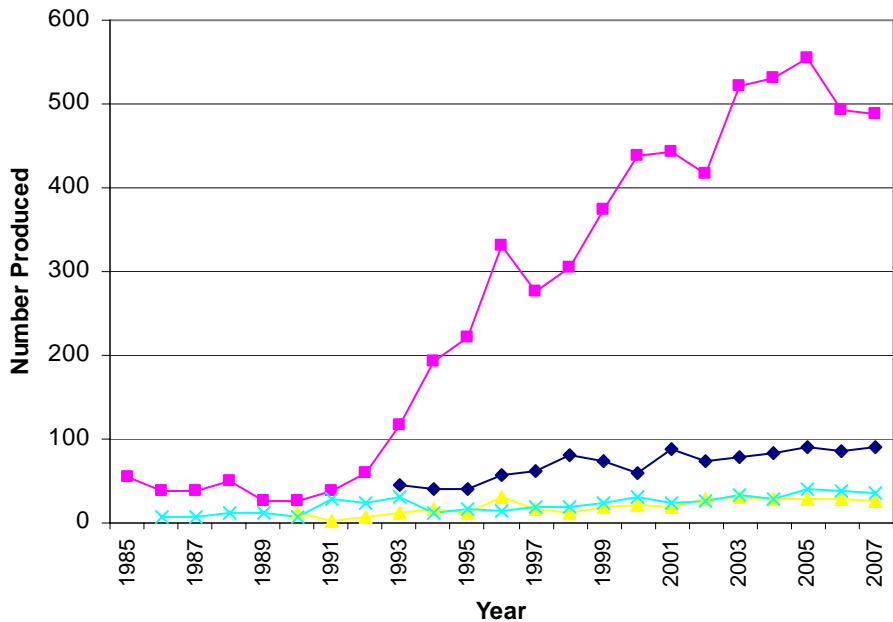

◆ Physician

■ General Nurse

▲ Radiographer

× Lab. Technician

Supplement: MOESM4 [file 9570564]
